# Supplementary material
Source: publisher figshare collection journal article supplement (https://gsapubs.figshare.com/ndownloader/files/22758644)
Supplement: Supplementary file 1 [file 22758644]

## 1    **Data Repository**

2    The reliability of  $V_p$  or  $V_p/V_s$  anomaly changes is ensured if the resolution of the  
3    velocity models is consistent between the different epochs. To satisfy this requisite, we  
4    accurately selected the data, P- and S-wave arrival times and seismic stations to gain a  
5    more homogeneous volume sampling by seismic rays and verified “a posteriori” the  
6    model resolution.

## 7    *Data Selection*

8    From the original dataset consisting of 2100 earthquakes, we selected earthquakes with  
9    hypocentral errors less than 1 km, rms location less than 0.3 s, azimuthal gap less than  
10     $180^\circ$  and at least 18 seismic phases. Moreover, we optimize the volume sampling  
11    selecting those earthquakes that ensure a similar time spent at each node of the velocity  
12    model (similar Derivative Weight Sum). This requisite leads to the used epochs sub-  
13    division.

## 14    *Details of the velocity inversions for the three epochs.*

15    Epoch a (27/09-07-10) directly follows the two 26/09 mainshocks. A total of 6529 P-  
16    wave and 5940 S-P arrival times from 357 earthquakes are inverted achieving 75 % of  
17    the variance reduction and 0.08 s of the final rms, after 4 iterations.

18    Epoch b (07-10-17-10) encompasses the period during which the seismicity strongly  
19    migrated (figure 1). A total of 6348 P-wave and 5825 S-P arrival times from 364  
20    earthquakes are inverted, achieving 71 % of the variance reduction and 0.08 s of the  
21    final rms after 4 iterations.

22 During Epoch c (18/10-03/11) seismicity is spread over the entire fault system. A total  
 23 of 6590 P-wave and 6221 S-P arrival times from 451 earthquakes are inverted,  
 24 achieving 82 % of the variance reduction and 0.08 s of the final rms after 4 iterations.

25

## 26 *Resolution*

27 For each epoch, we computed the full resolution matrix (R), following the approach of  
 28 [De Gori et al., 2005]. The contribution of off-diagonal nodes in the estimation of each  
 29 parameter is visualized by the spread function of R. For a node to be well resolved, the  
 30 volume over which the velocity is estimated is centred to the node and the SF value is  
 31 small. Supplementary figure. 1 shows the spread function and the DWS of the Vp/Vs  
 32 model for the three epochs. We note that the region encompassing the 4D Vp/Vs  
 33 variations is similarly resolved during the three epochs.

34 To further verify the reliability of anomaly change, we performed several synthetic  
 35 tests using “a priori” known heterogeneous models. P- and S-wave arrival times are  
 36 computed tracing seismic rays through the synthetic model. They are inverted, after  
 37 adding random noise, using the same model and parameters of the real inversion. We  
 38 show results from one of those tests (Supplementary figure 2). Synthetic features are  
 39 two high Vp/Vs anomalies located at 0 and 5 km depth and present in all the three  
 40 epochs. We observe that anomaly 1 is well reproduced by the three epochs, and  
 41 anomaly 2 is well reproduced in epochs b and c, while in epoch a is underestimated. The  
 42 perturbation in nodes at the southern portion of the fault system is only slightly positive  
 43 (+0.01) and not visible in the image. The resolution here is poor in epoch a, since  
 44 seismicity migrated to the south only in periods b and c. Thus, the observed anomaly

45 changes are time-resolved for the whole period and only since October 7 in the central  
46 and southern part of the fault system, respectively.

47

#### 48 **Figure Captions**

49 **Supplementary Figure 1** Map of the spread function (grey coded scale and white  
50 contours) and DWS (contour line of 1000 in pink colour) for each epoch.

51 **Supplementary Figure 2** Results of synthetic test for the three epochs. Two synthetic  
52 high Vp/Vs anomalies are located at the border of the central segment and on the  
53 southern segment, at 0 and 5 km depth, respectively. The synthetic features are  
54 consistently resolved by the three epochs.

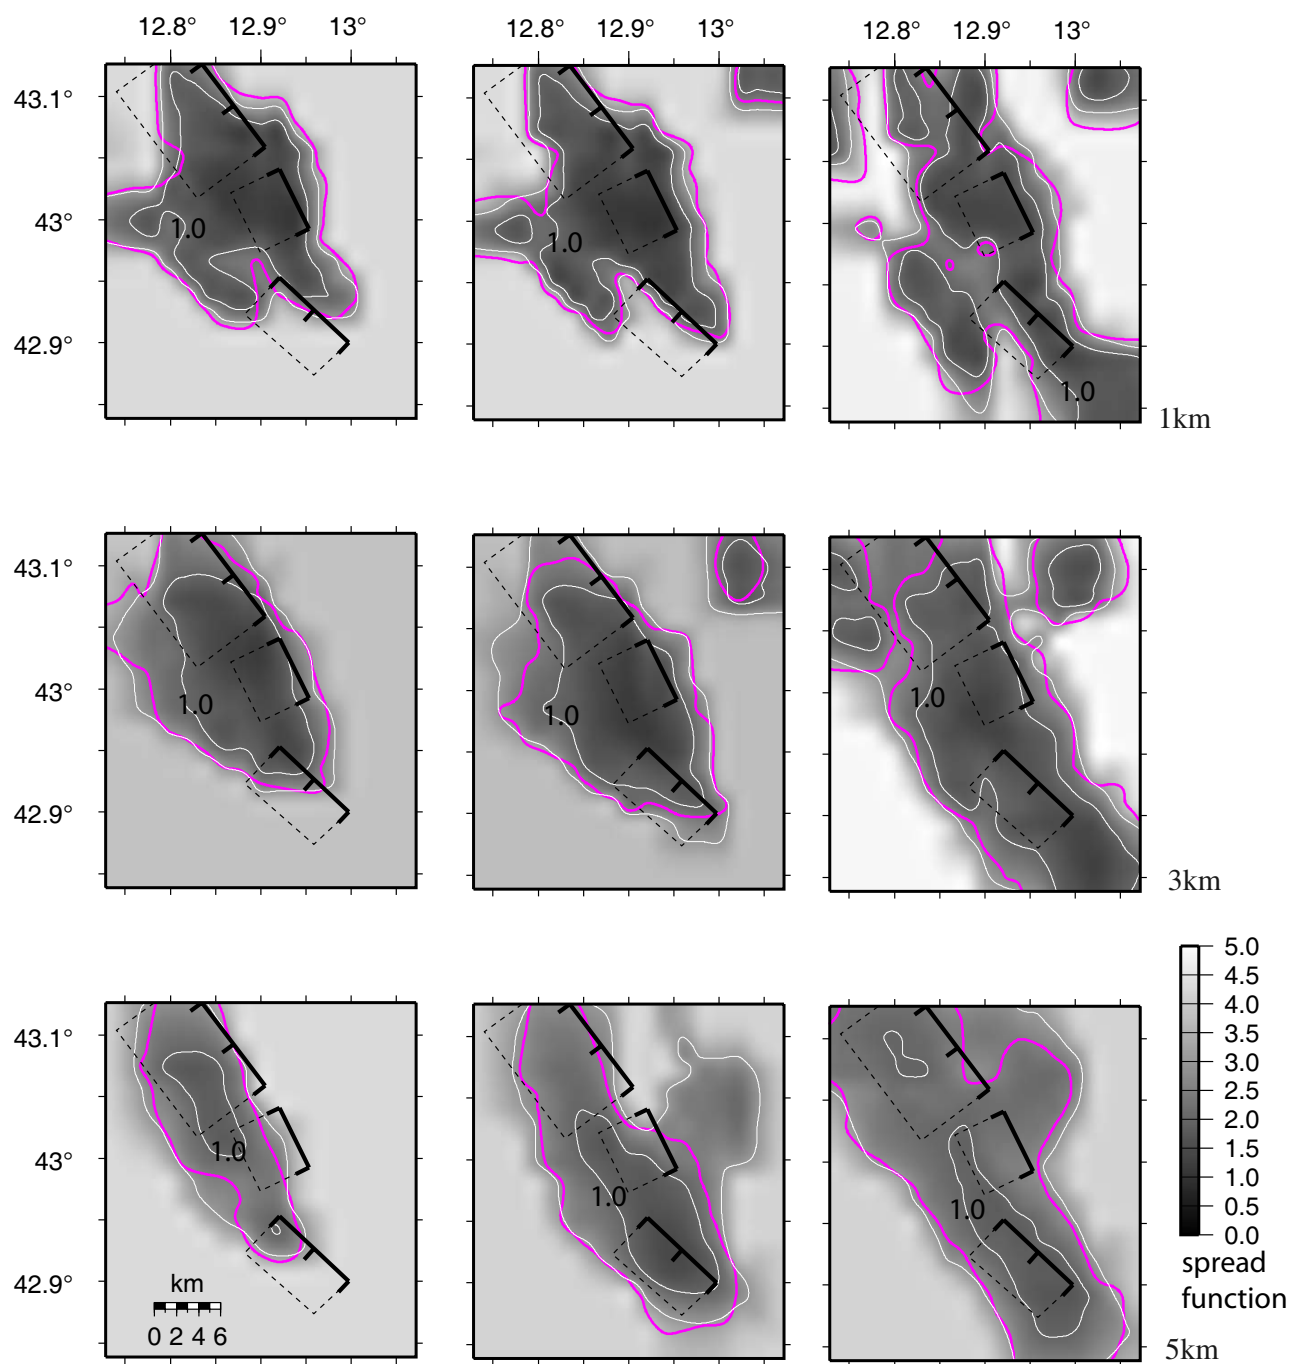

Supplementary Figure 1

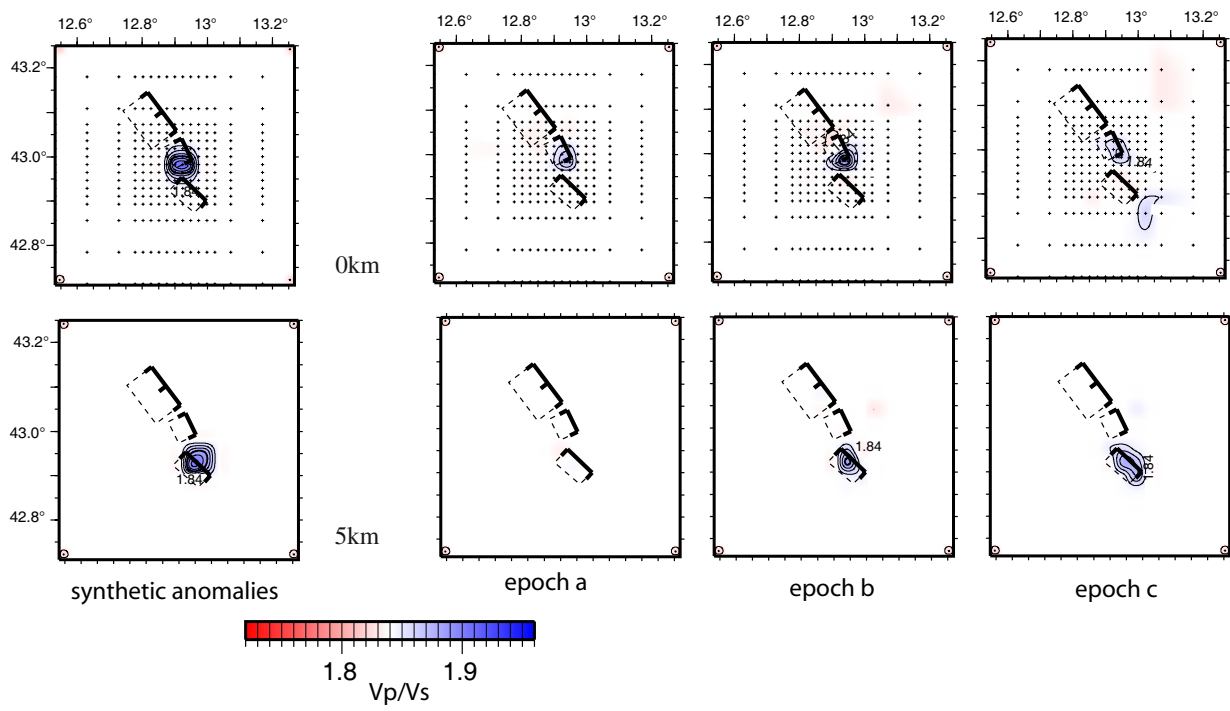

Supplementary Figure 2
